# Supplementary material
Source: PubMed Central journal article supplement (PMC4618094)
Supplement: NIHMS687442-supplement-10439_2015_1327_MOESM1_ESM.pdf [file NIHMS687442-supplement-10439_2015_1327_MOESM1_ESM.pdf]

## Online Resource 1

Linear Regressions of Estimates of  $^{18}\text{F}$ -FDG Parameters from both Models

Slopes and intercepts of linear regressions between parameter estimates of the delayed input function model and the right heart input function model are given in Table S1.

**Table S1.** Slopes and intercepts for linear regressions of delayed input function and right heart input function model parameter estimates.

|       | Control      |       |         |                                |       |                          |
|-------|--------------|-------|---------|--------------------------------|-------|--------------------------|
|       | slope (m)    |       |         | intercept ( $y_{\text{int}}$ ) |       |                          |
|       | estimate     | SE    | p (m=1) | estimate                       | SE    | p ( $y_{\text{int}}=0$ ) |
| $k_1$ | 0.579        | 0.086 | <0.001  | 0.011                          | 0.011 | 0.338                    |
| $k_2$ | 0.554        | 0.158 | 0.012   | 0.136                          | 0.114 | 0.248                    |
| $k_3$ | 1.128        | 0.052 | 0.025   | -0.001                         | 0.001 | 0.299                    |
| $F_B$ | 1.272        | 0.040 | <0.001  | 0.005                          | 0.004 | 0.187                    |
| $F_e$ | 0.865        | 0.048 | 0.012   | 0.004                          | 0.008 | 0.614                    |
| $K_i$ | 0.967        | 0.010 | 0.005   | 0.000                          | 0.000 | 0.200                    |
|       | LPS          |       |         |                                |       |                          |
|       | slope (m)    |       |         | intercept ( $y_{\text{int}}$ ) |       |                          |
|       | estimate     | SE    | p (m=1) | estimate                       | SE    | p ( $y_{\text{int}}=0$ ) |
| $k_1$ | 0.701        | 0.096 | 0.007   | -0.007                         | 0.007 | 0.921                    |
| $k_2$ | 0.771        | 0.093 | 0.026   | -0.036                         | 0.045 | 0.435                    |
| $k_3$ | 1.006        | 0.051 | 0.908   | -0.001                         | 0.002 | 0.620                    |
| $F_B$ | 1.076        | 0.030 | 0.022   | 0.014                          | 0.003 | <0.001                   |
| $F_e$ | 1.042        | 0.021 | 0.063   | -0.009                         | 0.004 | 0.047                    |
| $K_i$ | 0.969        | 0.200 | 0.139   | 0.000                          | 0.000 | 0.285                    |
|       | Lavage + LPS |       |         |                                |       |                          |
|       | slope (m)    |       |         | intercept ( $y_{\text{int}}$ ) |       |                          |
|       | estimate     | SE    | p (m=1) | estimate                       | SE    | p ( $y_{\text{int}}=0$ ) |
| $k_1$ | 1.013        | 0.061 | 0.838   | -0.012                         | 0.004 | 0.014                    |
| $k_2$ | 0.475        | 0.064 | <0.001  | 0.061                          | 0.017 | 0.003                    |
| $k_3$ | 0.910        | 0.057 | 0.131   | 0.001                          | 0.002 | 0.551                    |
| $F_B$ | 1.036        | 0.027 | 0.200   | 0.014                          | 0.003 | <0.001                   |
| $F_e$ | 1.024        | 0.013 | 0.086   | -0.001                         | 0.005 | 0.851                    |
| $K_i$ | 0.966        | 0.013 | 0.020   | 0.000                          | 0.000 | 0.486                    |

SE, standard error of the estimate; m, slope;  $y_{\text{int}}$ , y-intercept. For each  $^{18}\text{F}$ -FDG parameter, the linear regression of the delayed input function model parameters onto the right heart input function model parameters was computed. To compare regressions with the line of identity, p values are given for the null hypotheses that the regression slope was equal to 1 and the regression intercept was equal to 0.

## Online Resource 2

Bland-Altman Analysis and ROI Dependence of Agreement between Perfusion Estimates

In this supplement, we present additional analysis of agreement between measurements of mean-normalized perfusion derived using the  $^{18}\text{F}$ -FDG and  $^{13}\text{N}$  imaging techniques. Figure S1 shows Bland-Altman style plots comparing the two measurement techniques. Figure S2 shows the dependence of the level of agreement on ROI size in each condition. Agreement between the techniques decreased with smaller ROI sizes, with acceptable levels of agreement maintained down to ROI volumes of about 50 mL.

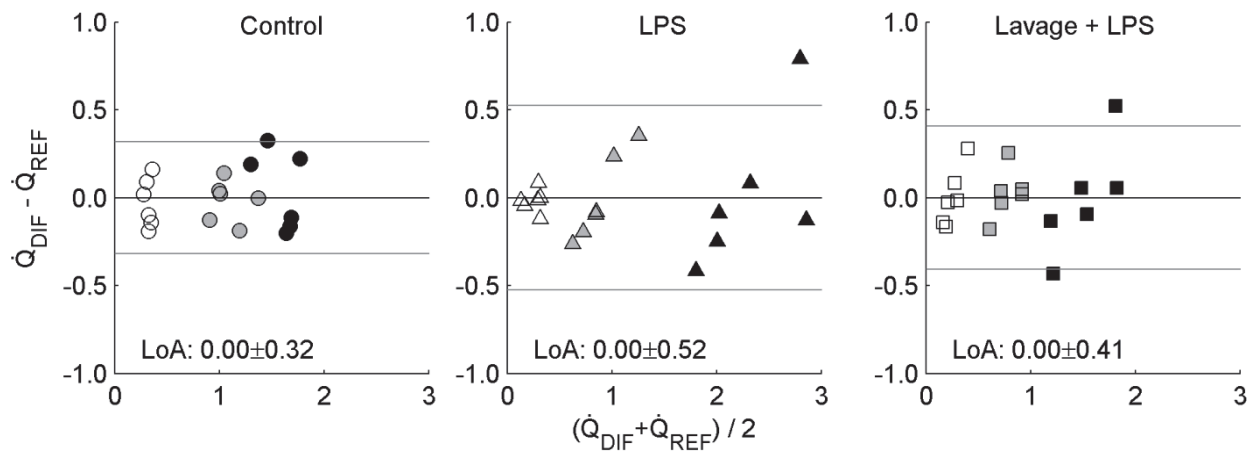

**Figure S1.** Bland-Altman plots of differences between perfusion measured with the delayed input function model ( $Q_{\text{DIF}}$ ) and perfusion measured with the reference  $^{13}\text{N}$  method ( $Q_{\text{REF}}$ ) in three isogravitational ROIs in each condition (black=dependent, gray=middle, white=non-dependent region). Because both sets of measurements were mean-normalized, the average difference (i.e., the bias) was necessarily zero. Differences were not correlated with perfusion magnitude in any of the conditions. Gray lines indicate limits of agreement (LoA), defined as 95% confidence intervals around the average difference of 0. ROI volumes averaged  $183 \pm 60$  mL (Control),  $150 \pm 44$  mL (LPS),  $95 \pm 37$  mL (Lavage + LPS).

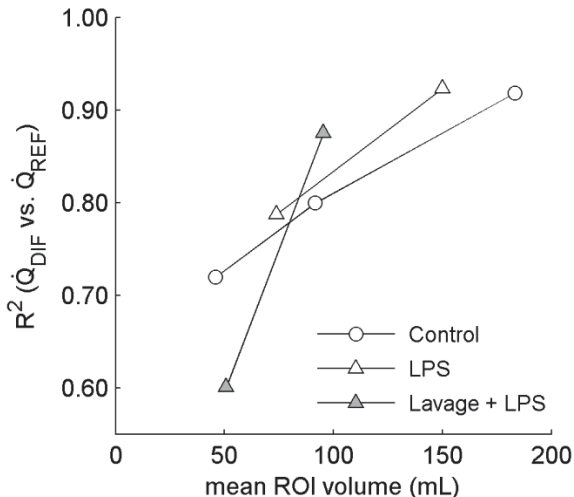

**Figure S2.** Agreement between  $Q_{\text{DIF}}$  and  $Q_{\text{REF}}$  versus ROI size. Agreement was defined as the coefficient of determination ( $R^2$ ) for the linear regression of  $Q_{\text{DIF}}$  onto  $Q_{\text{REF}}$ . In the Control group, ROI configurations of 3, 6, and 12 vertically divided ROIs were studied. In the Lung Injury group, each lung (right = LPS, left = Lavage + LPS) was divided into either 3 or 6 ROIs. The agreement between the techniques decreased with smaller ROI sizes, but acceptable agreement was observed down to ROI volumes of about 50 mL.

## Online Resource 3

Effect of Cardiac Output on Regional Delay Measurements

In order to estimate and subtract out the pulmonary artery delay, our technique relies on measurements of cardiac output, which are not always available in clinical settings. However, cardiac output can often be estimated with reasonable accuracy using other physiological measurements and patient characteristics. Therefore, we examined how errors in cardiac output would influence our measurements of the regional lung input function delay ( $t_{lung}$ ). Based on Equation 1 of the main text, we estimated the pulmonary artery delay ( $t_{PA}$ ) as:

$$t_{PA} = \frac{V_{PA}}{CO} \quad (S1)$$

where  $V_{PA}$  is the pulmonary artery blood volume and CO is the cardiac output (i.e., pulmonary artery blood flow). As derived in the main text,  $t_{PA}$  is subtracted from the total regional delay measured from  $^{18}F$ -FDG kinetics ( $t_{delay}$ ) to compute the regional lung-specific delay ( $t_{lung}$ ). Thus,  $t_{lung}$  has a non-linear dependence on cardiac output given by:

$$t_{lung} = t_{delay} - \frac{V_{PA}}{CO} \quad (S2)$$

Therefore, the influence of errors in CO on measurements of  $t_{lung}$  would depend on the specific values of  $t_{delay}$  and  $V_{PA}$ . When  $t_{delay}$  is relatively large compared to  $t_{PA}$ , errors in  $t_{lung}$  caused by over or underestimation of CO would be relatively small. Our experimental measurements of  $t_{PA}$  and  $t_{delay}$  suggest that this was indeed the case. In the control group, the  $t_{PA} / t_{delay}$  fraction averaged  $0.18 \pm 0.09$  (mean  $\pm$  SD), and in the lung injury group  $0.17 \pm 0.08$ .

We also performed simple simulations to determine the effect of errors in CO on  $t_{lung}$ . For all studied ROIs, we introduced errors in CO ranging from -30% to 30% and calculated the resulting errors in  $t_{lung}$ , using experimental values of  $t_{delay}$  and  $V_{PA}$  for each ROI. Consistent with

Equation S2, errors in  $t_{\text{lung}}$  showed a non-linear dependence on errors in CO, with underestimation of CO leading to larger error magnitude than overestimation (Figure S3). However, errors in  $t_{\text{lung}}$  were notably smaller than those in CO, with average error in  $t_{\text{lung}}$  remaining under 10% even for 30% error in CO (Figure S3). Thus, the accuracy of the parameter  $t_{\text{lung}}$  is not critically dependent on the accuracy of cardiac output estimates, allowing for application of the technique in settings where cardiac output cannot be measured and must be estimated from surrogate parameters.

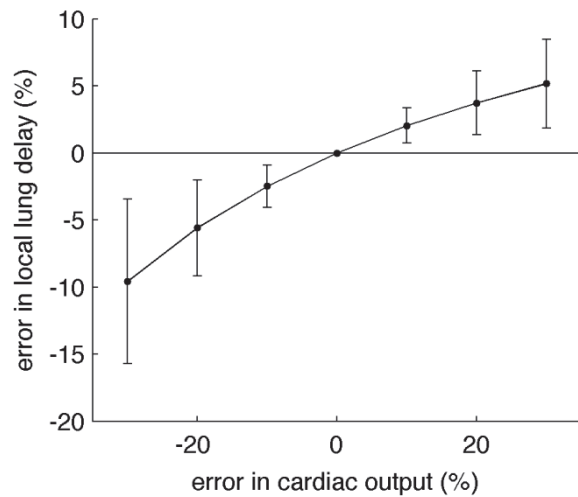

**Figure S3.** Dependence of error in local lung delay ( $t_{\text{lung}}$ ) on error in cardiac output for data from all animals and regions-of-interest. Mean $\pm$ SD are shown for each point.
